# Supplementary material for: Expression of cell cycle regulators and frequency of TP53 mutations in high risk gastrointestinal stromal tumors prior to adjuvant imatinib treatment
Source: PLoS One. 2018 Feb 16;13(2):e0193048. doi: 10.1371/journal.pone.0193048 (PMC5815598; doi:10.1371/journal.pone.0193048)
Supplement: S1 Table — (XLSX) [file pone.0193048.s001.xlsx]

## Sheet: Supp. Table 1
Supplementary Table 1: Antibodies
Gene	Dilution	Antigen	Clone	Company
CCND1	1:25	rabbit monoclonal	SP4	Cell Marque Corporation, Rocklin, CA, USA
CDK4	1:200	mouse monoclonal	DCS-31	Thermo Fisher Scientific Inc., Waltham, MA, USA
CDKN1A	1:25	mouse monoclonal	DCS-60.2	Thermo Fisher Scientific Inc., Waltham, MA, USA
CDKN2A	ready to use	mouse monoclonal	E6H4TM	CINtech® Histology kit, Ventana Medical Systems, Inc, Tucson, AZ
E2F1	1:25	mouse monoclonal	KH95	Abcam Plc, Cambridge, UK
MDM2	1:100	mouse monoclonal	IF2	Thermo Fisher Scientific Inc., Waltham, MA, USA
phospho-RB1	1:50	rabbit polyclonal	Ser608	Danvers, MA, USA
TP53	1:400	mouse monoclonal	DO-7	Dako Deutschland GmbH, Hamburg, DE
